# Supplementary material
Source: publisher figshare collection journal article supplement (https://gsajournals.figshare.com/ndownloader/files/36988903)
Supplement: Supplementary file 1 [file 36988903]

**REFERENCES**

Aghayeva U, Bhattacharya A, Hobert O. 2020. A panel of fluorophore-tagged *daf-16* alleles. Micropub Biol. 10.17912/micropub.biology.000210.

Aghayeva U, Bhattacharya A, Sural S, Jaeger E, Churgin M, Fang-Yen C, Hobert O. 2021. DAF-16/FoxO and DAF-12/VDR control cellular plasticity both cell-autonomously and via interorgan signaling. PLoS Biol. 19:e3001204.

Angeles-Albores D, Lee RYN, Chan J, Sternberg PW. 2016. Tissue enrichment analysis for *C. elegans* genomics. BMC Bioinformatics. 17:366.

Larsch J, Ventimiglia D, Bargmann CI, Albrecht DR. 2013. High-throughput imaging of neuronal activity in *Caenorhabditis elegans*. Proc Natl Acad Sci USA. 110:E4266-4273.

Maurya AK, Sengupta P. 2021. *xbx-4*, a homolog of the Joubert syndrome gene FAM149B1, acts via the CCRK and RCK kinase cascade to regulate cilia morphology. Curr Biol. 31:5642-5649.

McLachlan IG, Kramer TS, Dua M, DiLoreto EM, Dag U, Srinivasan J, Flavell S. 2022. Diverse states and stimuli tune olfactory receptor expression levels to modulate food-seeking behavior. bioRxiv.https://doi.org/10.1101/2022.04.27.48971.

Taylor SR, Santpere G, Weinreb A, Barrett A, Reilly MB, Xu C, Varol E., Oikonomou P, Glenwinkel L, McWhirter R*, et al.* 2021. Molecular topography of an entire nervous system. Cell.184:4329-4347.
